# Supplementary material for: Site selection in Switzerland: parallelization of implementer data collection and technical–political decision-making
Source: Copernicus journal article supplement (doi:10.5194/sand-2-37-2023), 2023-09-06

Supplement of Saf. Nucl. Waste Disposal, 2, 37–37, 2023  
<https://doi.org/10.5194/sand-2-37-2023-supplement>  
© Author(s) 2023. CC BY 4.0 License.

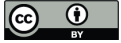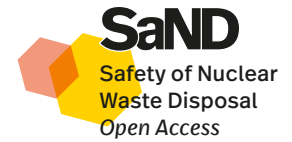

*Supplement of*

## **Site selection in Switzerland: parallelization of implementer data collection and technical–political decision-making**

**Tim Vietor**

*Correspondence to:* Tim Vietor ([tim.vietor@nagra.ch](mailto:tim.vietor@nagra.ch))

The copyright of individual parts of the supplement might differ from the article licence.

# **SITE SELECTION IN SWITZERLAND:**

## **PARALLELIZATION OF IMPLEMENTER'S DATA COLLECTION AND TECHNICAL-POLITICAL DECISION-MAKING**

Berlin, SafeND

Vietor

**nagra** ●

# SWISS SITE SELECTION PROCESS OUTLINE

-  Best suited **geology**
-  Optimization of **geological barrier**: properties, stability, reliability, constructability
-  **White map** approach (no preconditions / no exceptions)
-  → Technical / **safety criteria** only
-  **Stepwise screening** process (3 phases)
-  Aim: **General Licence Application** - GLA

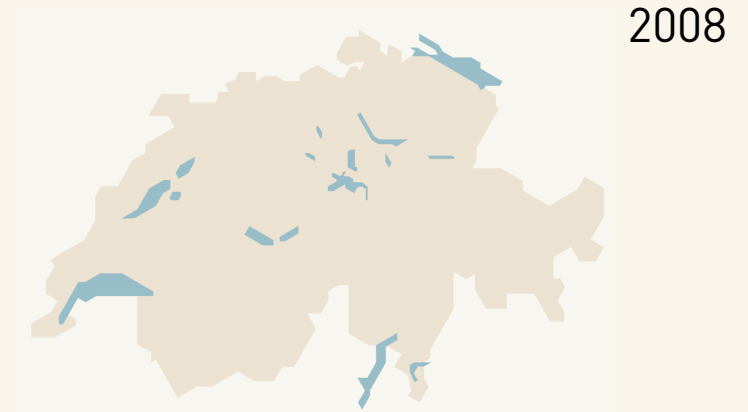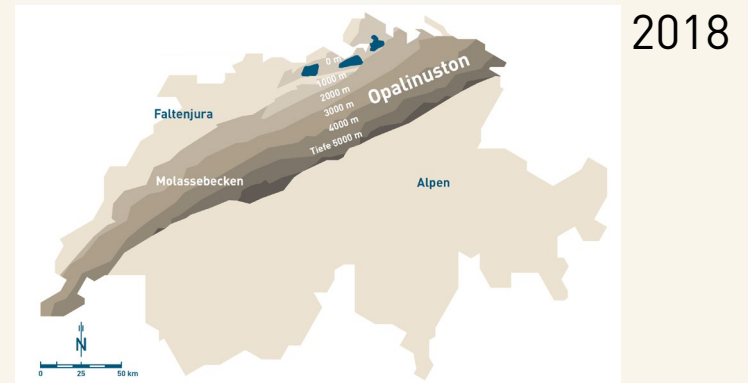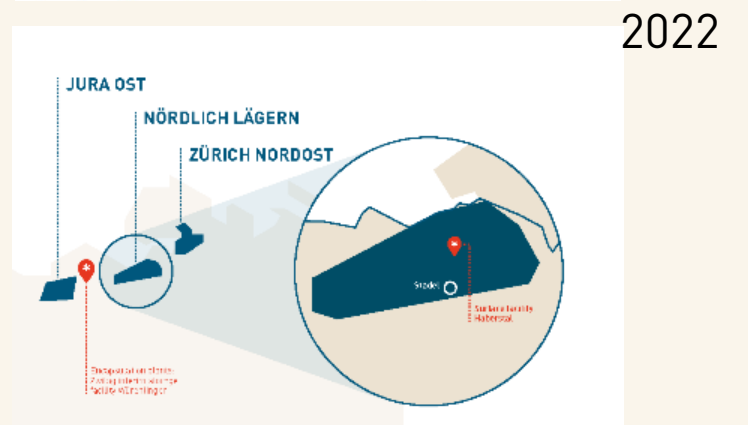

2031

# GENERAL LICENCE APPLICATION = *POLITICAL DECISION ON SITE*

Max Capacity

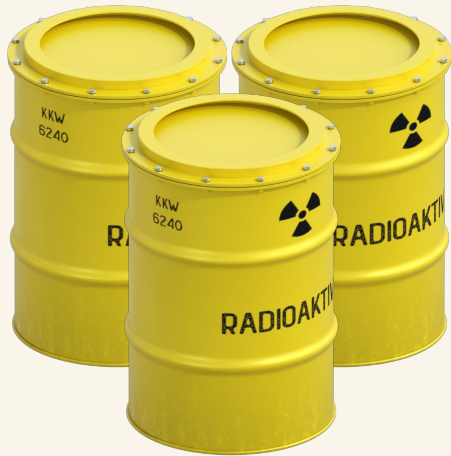

Function and position of main buildings

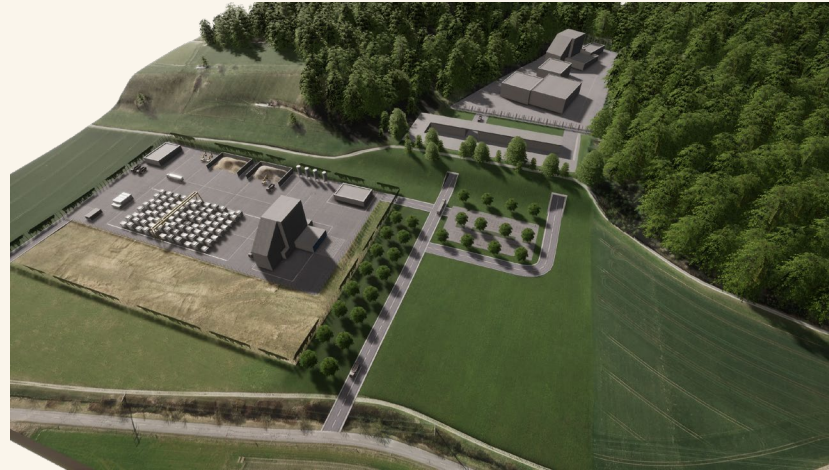

Protected area at depth

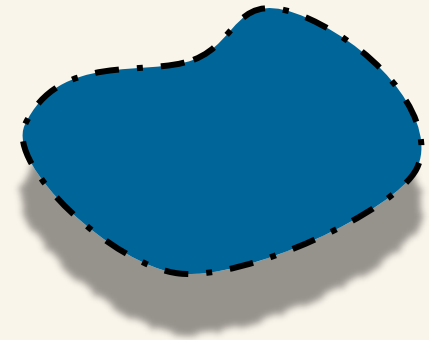

# GLA: *CONCEPTS* FOR LATER DETAILING

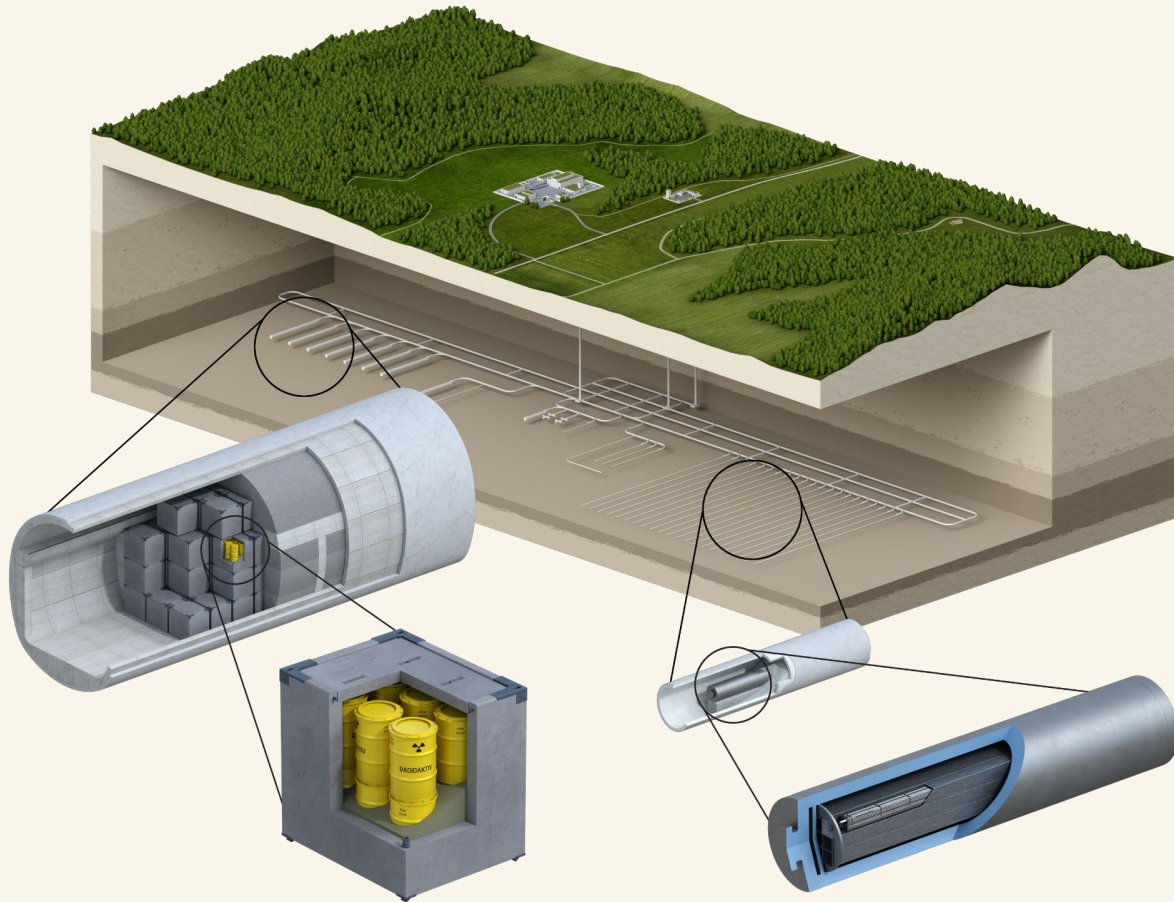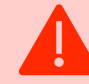

Safety and technical barrier concept

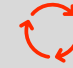

Operation

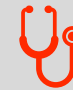

Ventilation

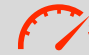

Monitoring

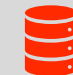

Optional retrieval

**Only very few key aspects**

demonstrated in some detail: Constructability of key elements, THM impact, gas transport

# STEPWISE SITE SELECTION

---

National screening  
(existing data)

Review & Decision  
Stage 1

Stage 2  
Site investigations

Review & Decision  
Stage 2

In sequence review process

Stage 3  
Site  
investigations

# STEPWISE SITE SELECTION

---

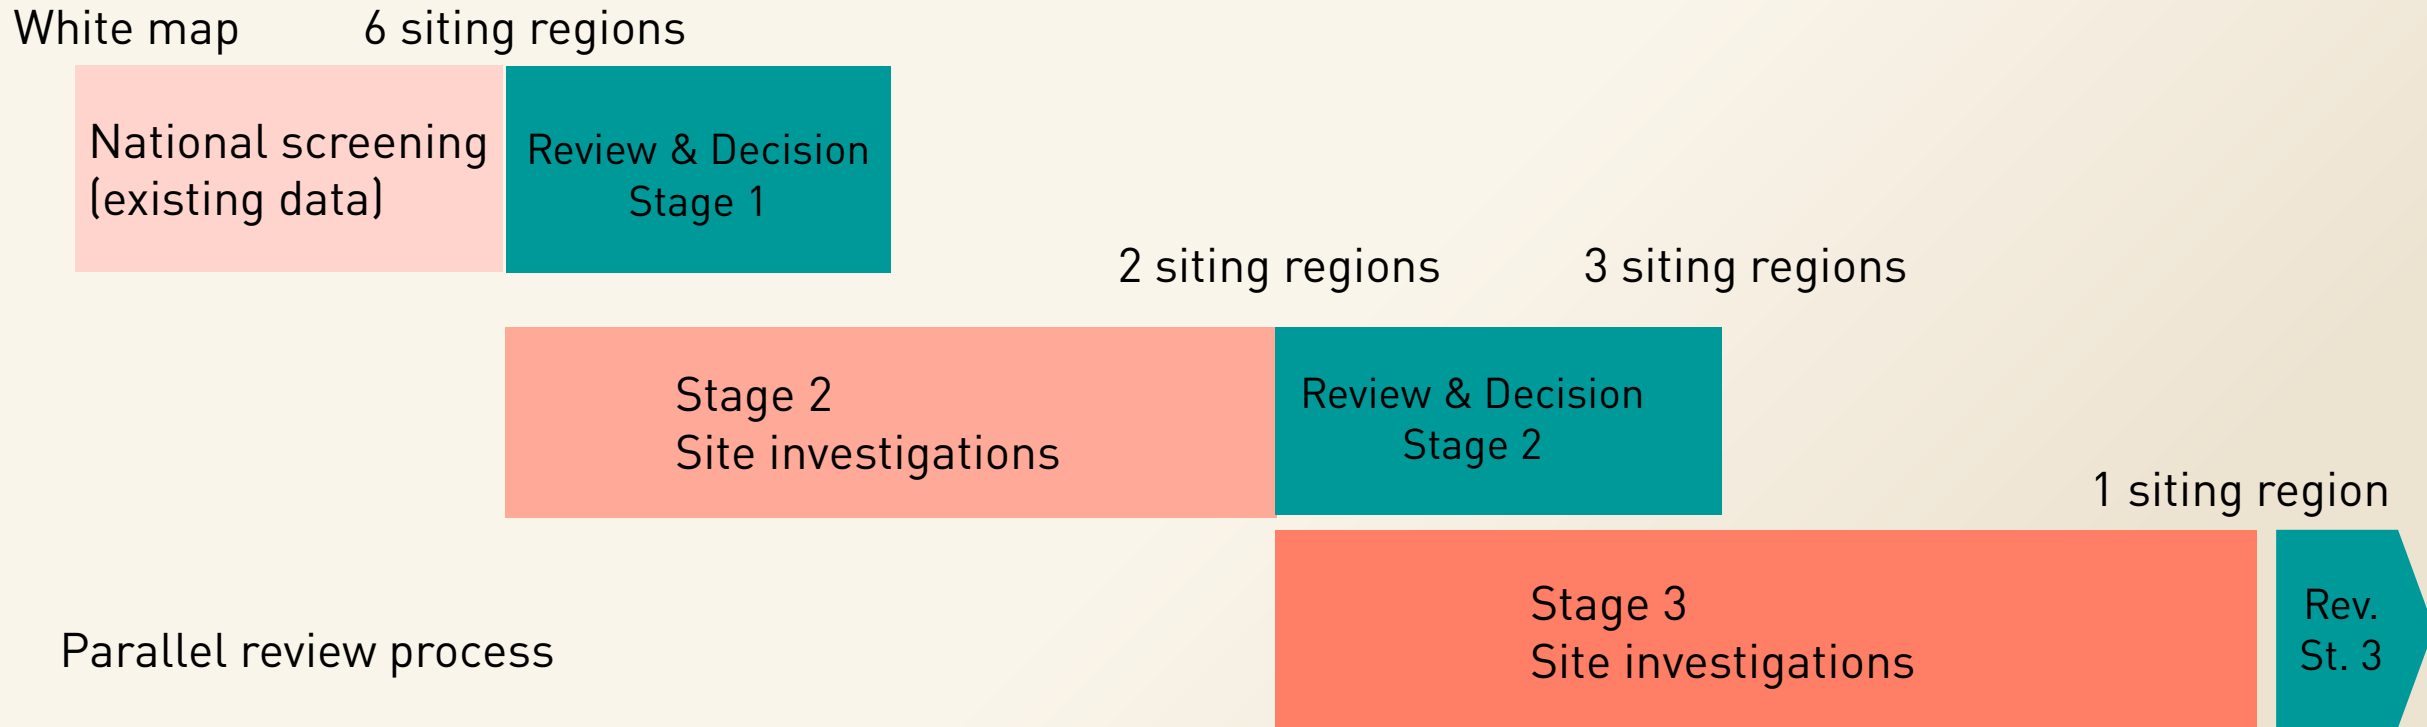

# STEPWISE SITE SELECTION

---

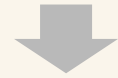

Regional conferences established

dissolved

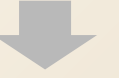

National screening  
(existing data)

Review & Decision  
Stage 1

Stage 2  
Site investigations

Review & Decision  
Stage 2

Stage 3  
Site investigations

Rev.  
St. 3



# STEPWISE SITE SELECTION

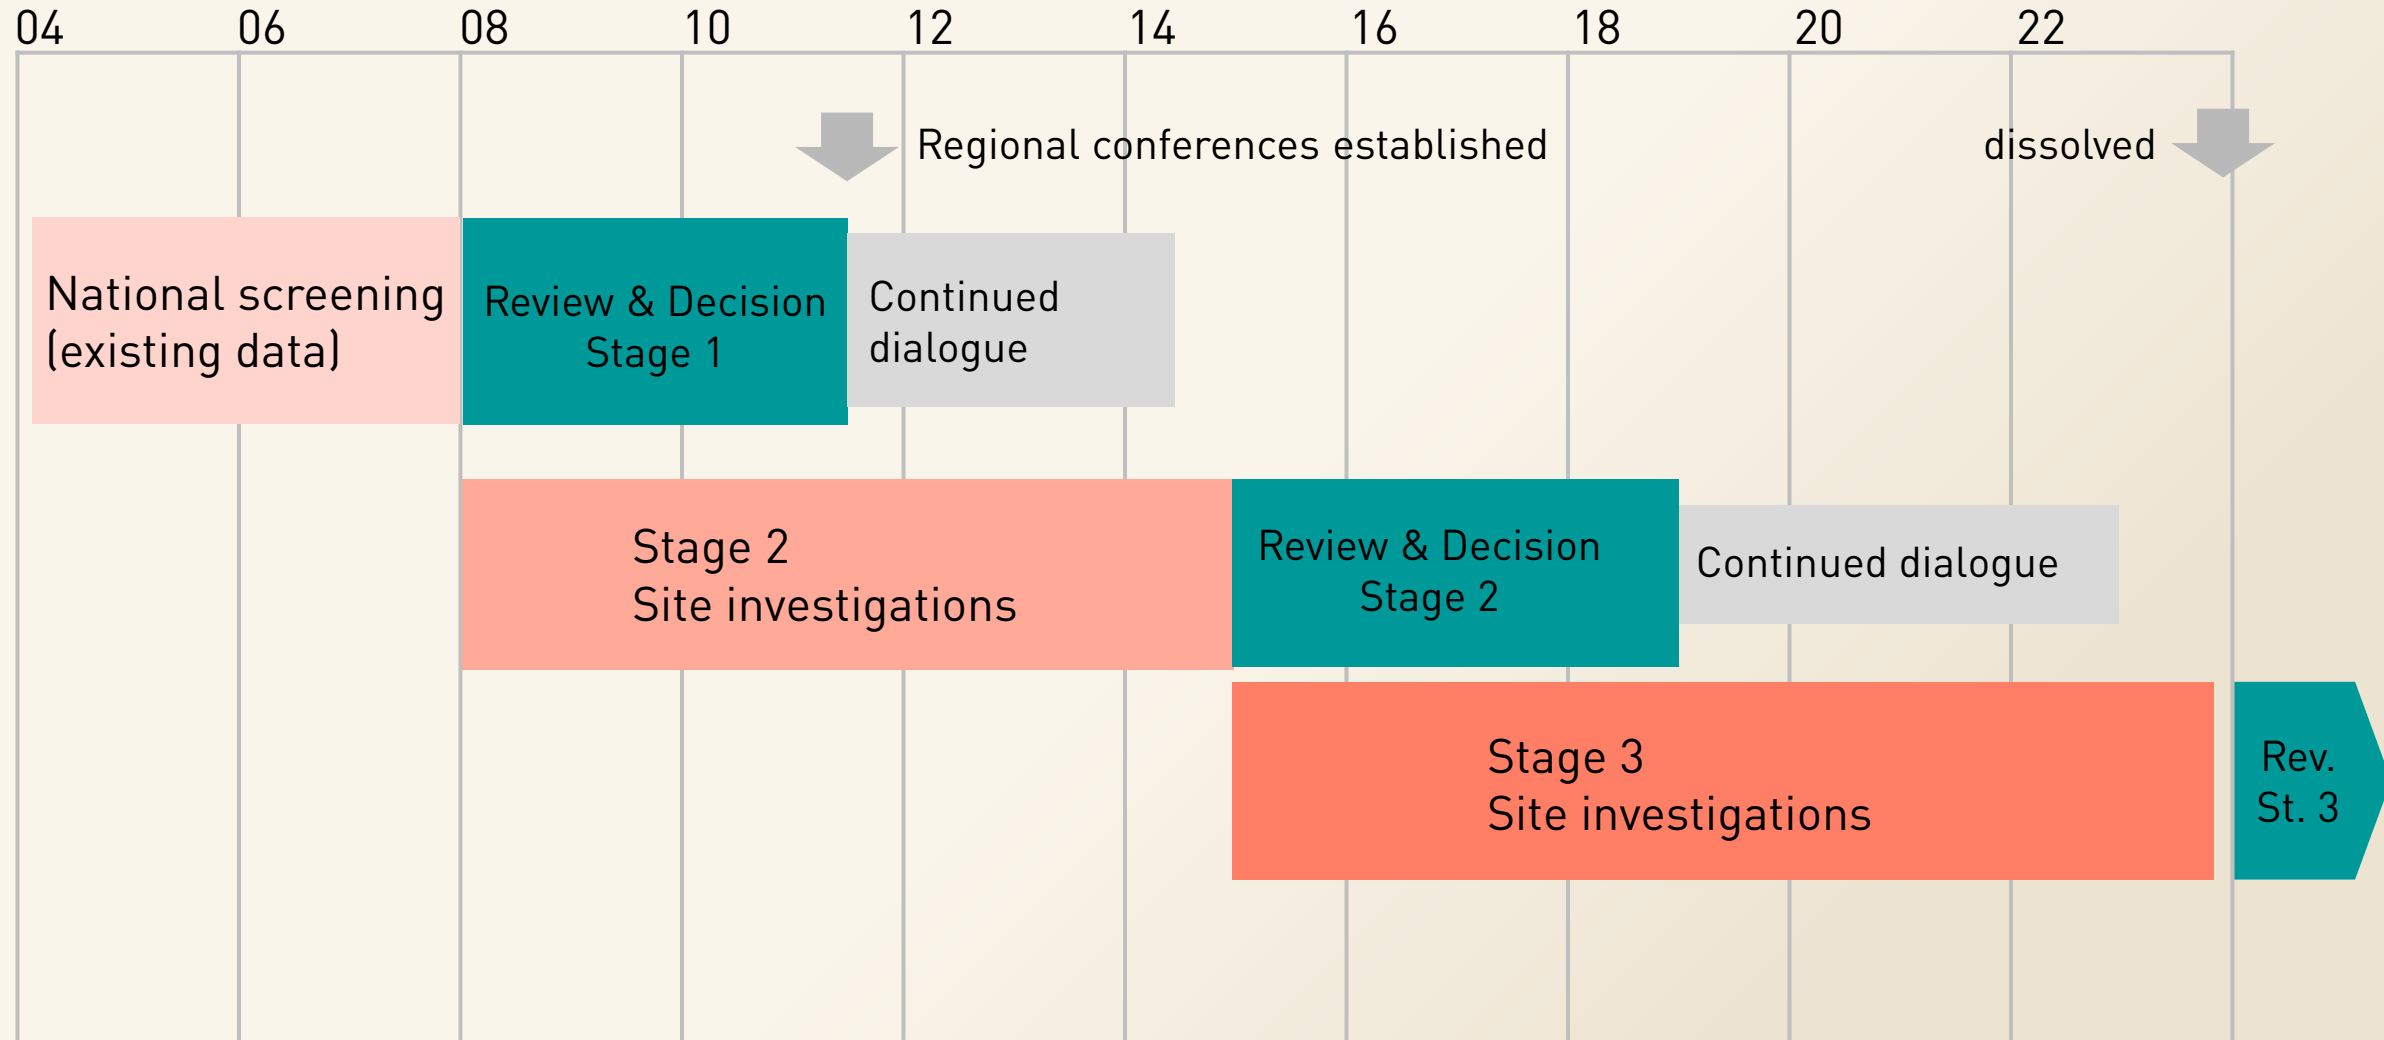

# STEPWISE SITE SELECTION

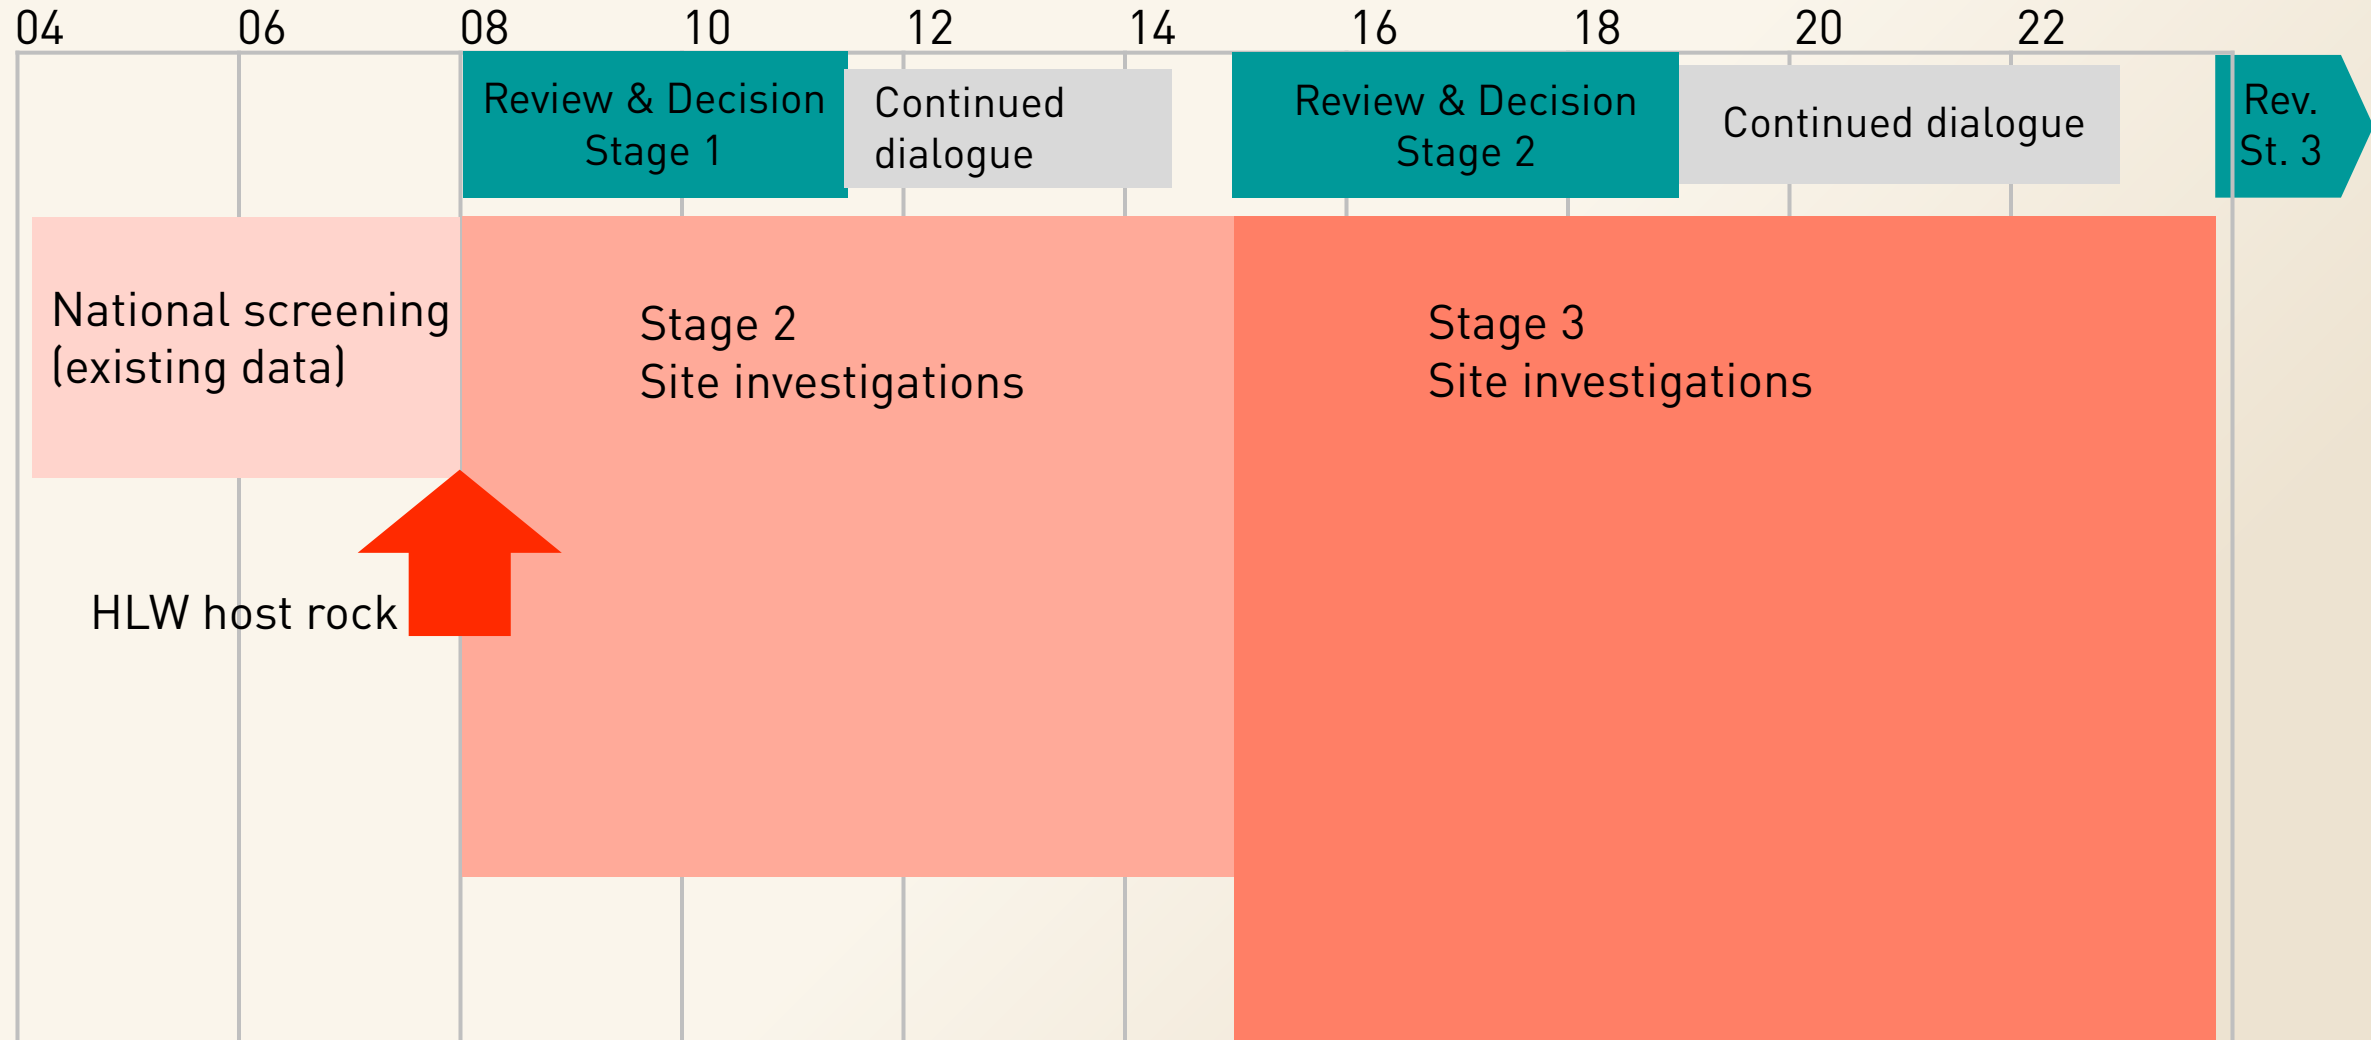

# EARLY DECISION ON HOST ROCK: CLAY

---

*allowed to prepare key demonstrations and site investigation methods*

## Soft rock challenges

- Excavation stability
- Borehole stability during downhole testing
- Sample conditioning

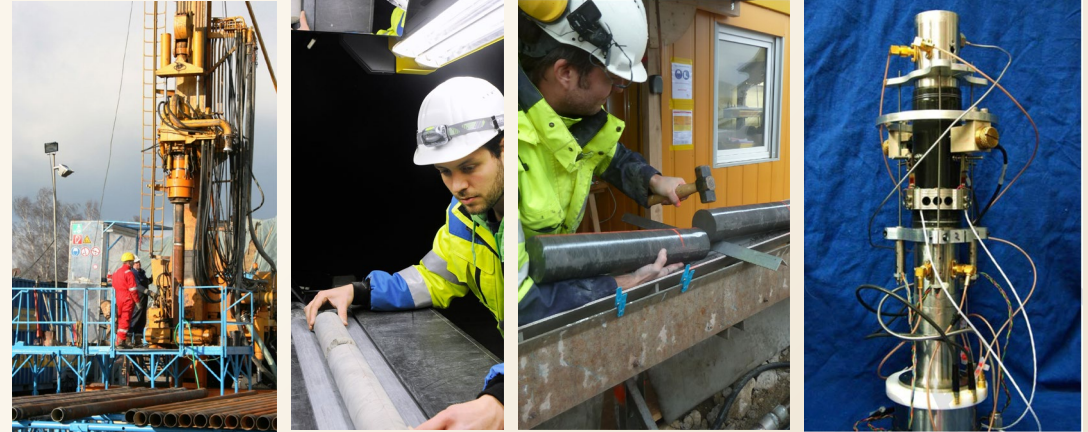

## Low permeability to water and gas

- THM overpressures?
- Gas overpressures?

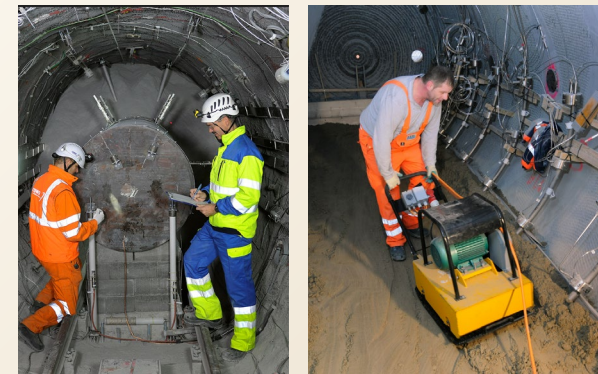

# STEPWISE SITE SELECTION IN PARALLEL WITH RD&D

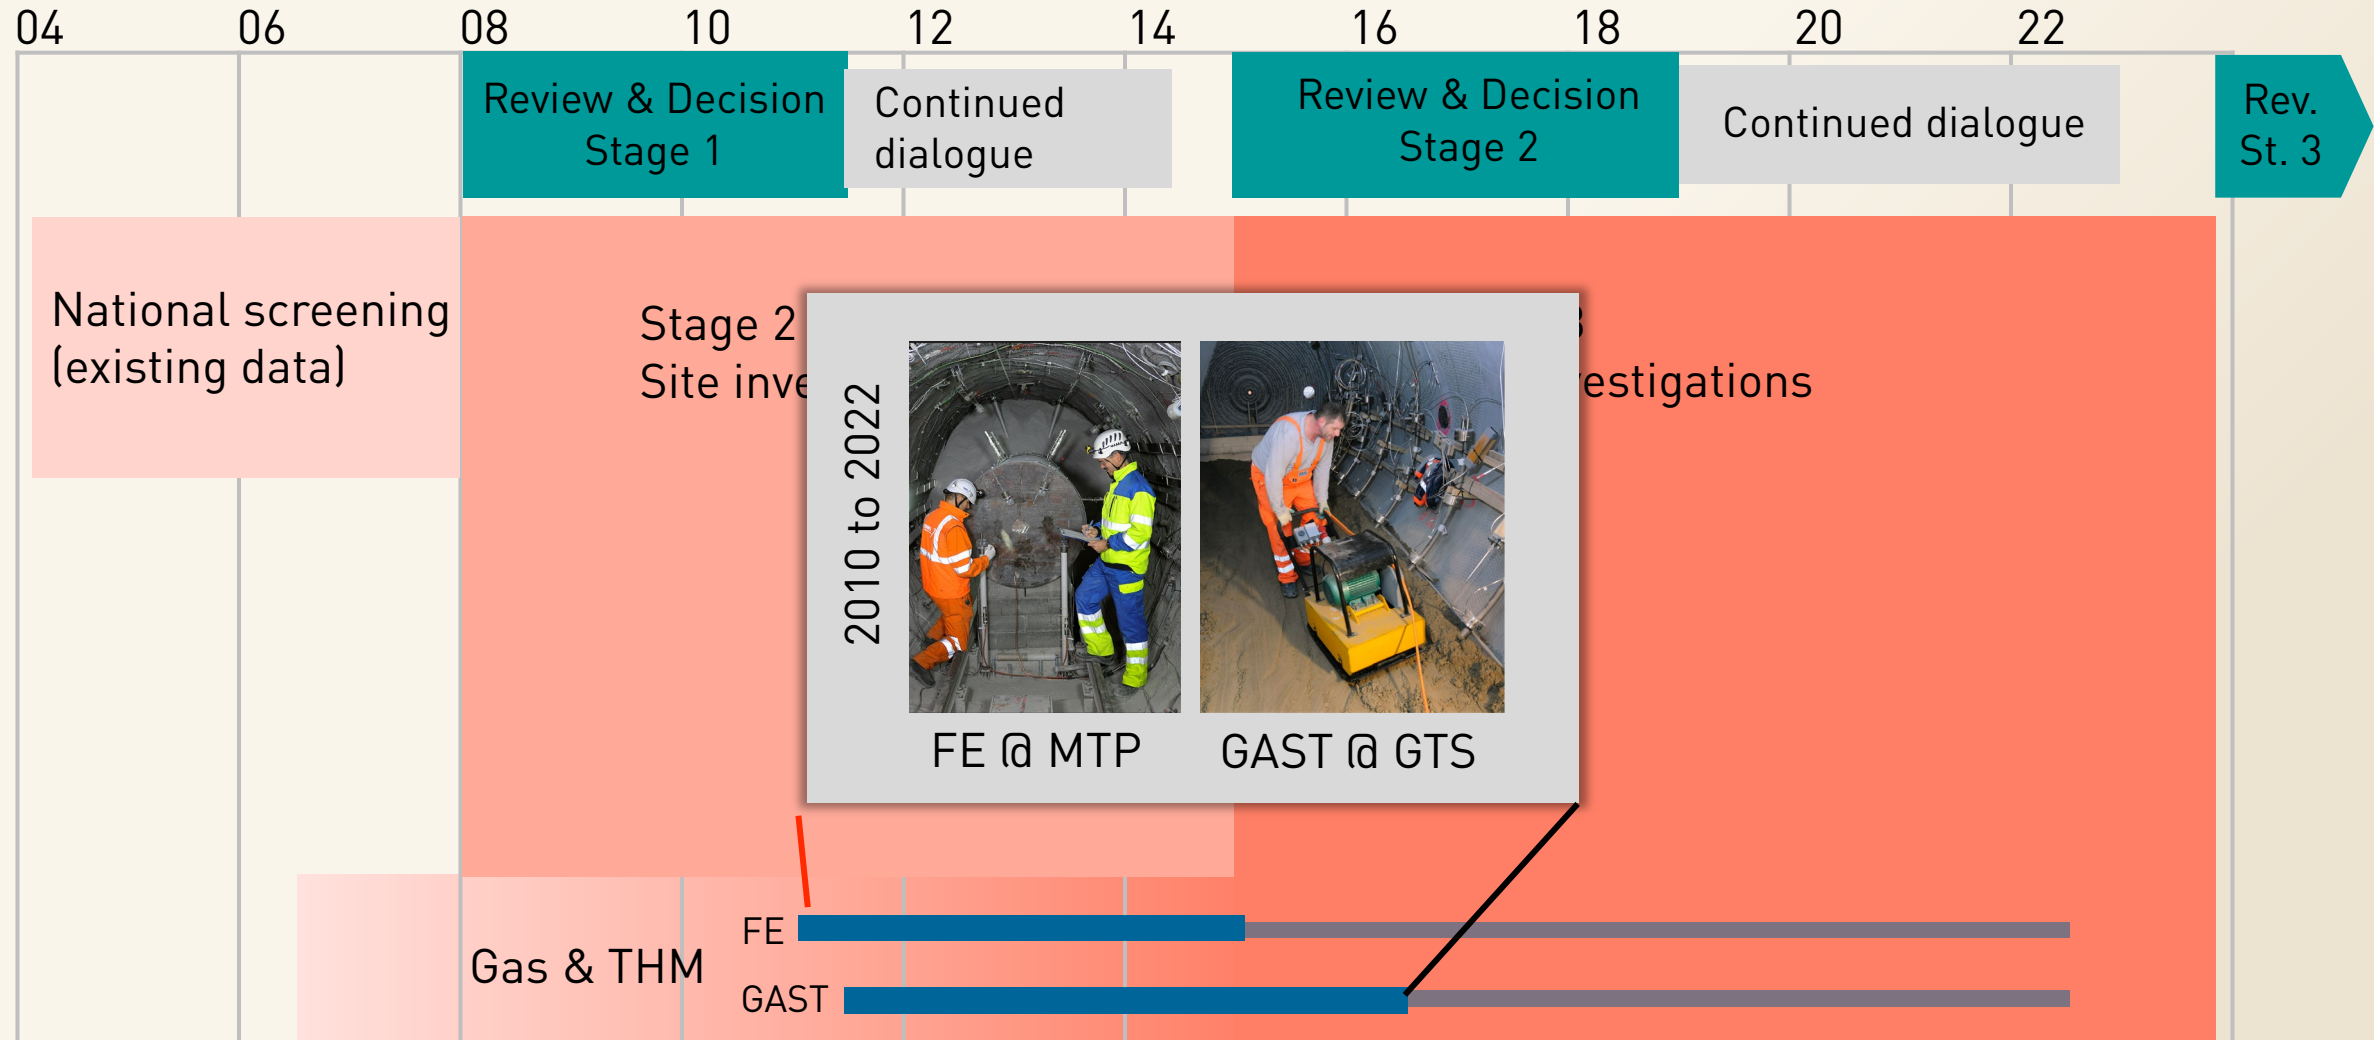

# STEPWISE SITE SELECTION: PREPARATION OF DRILLING

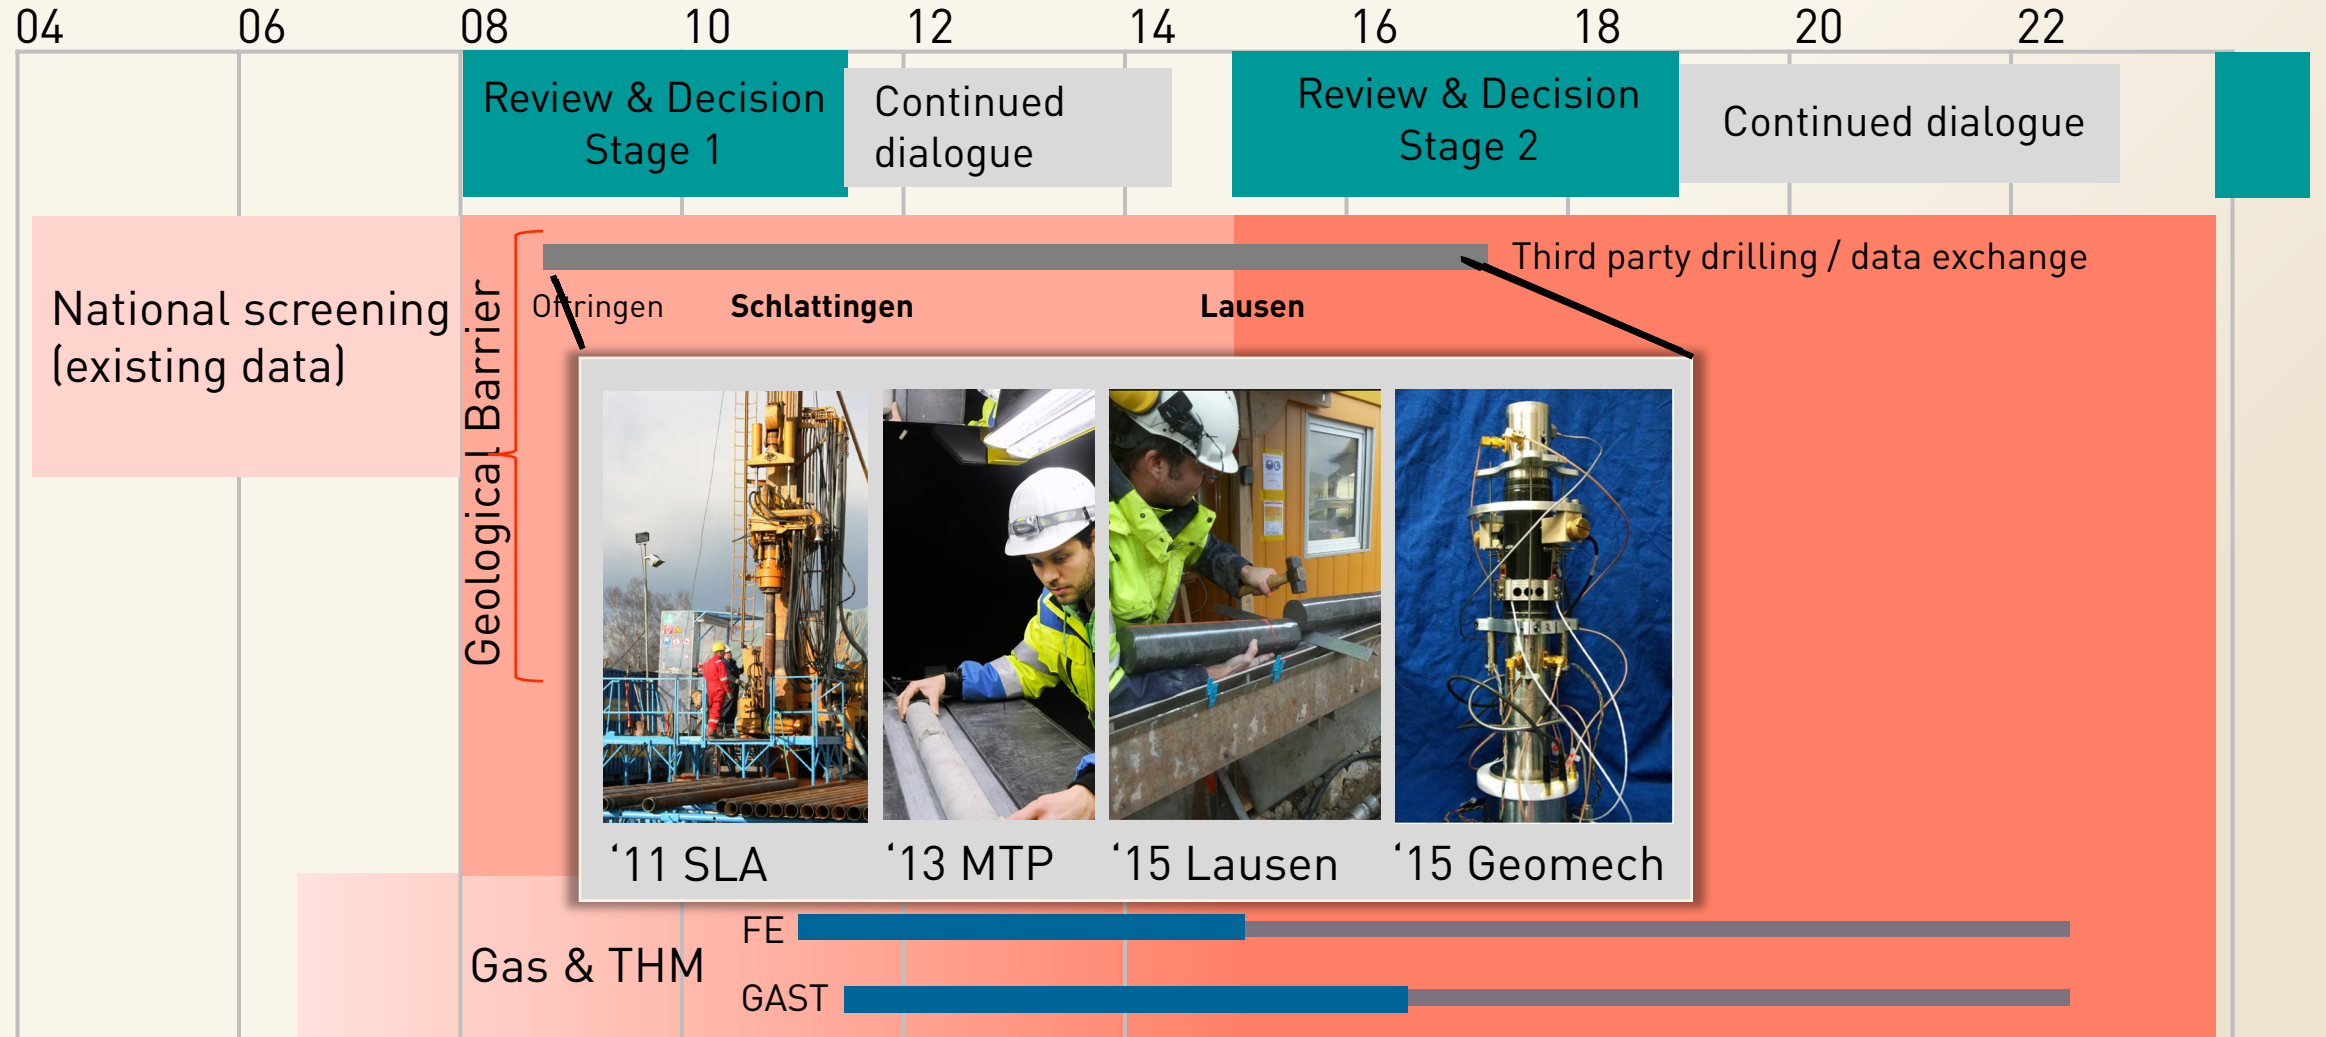

# STEPWISE SITE SELECTION IN PARALLEL WITH RD&D

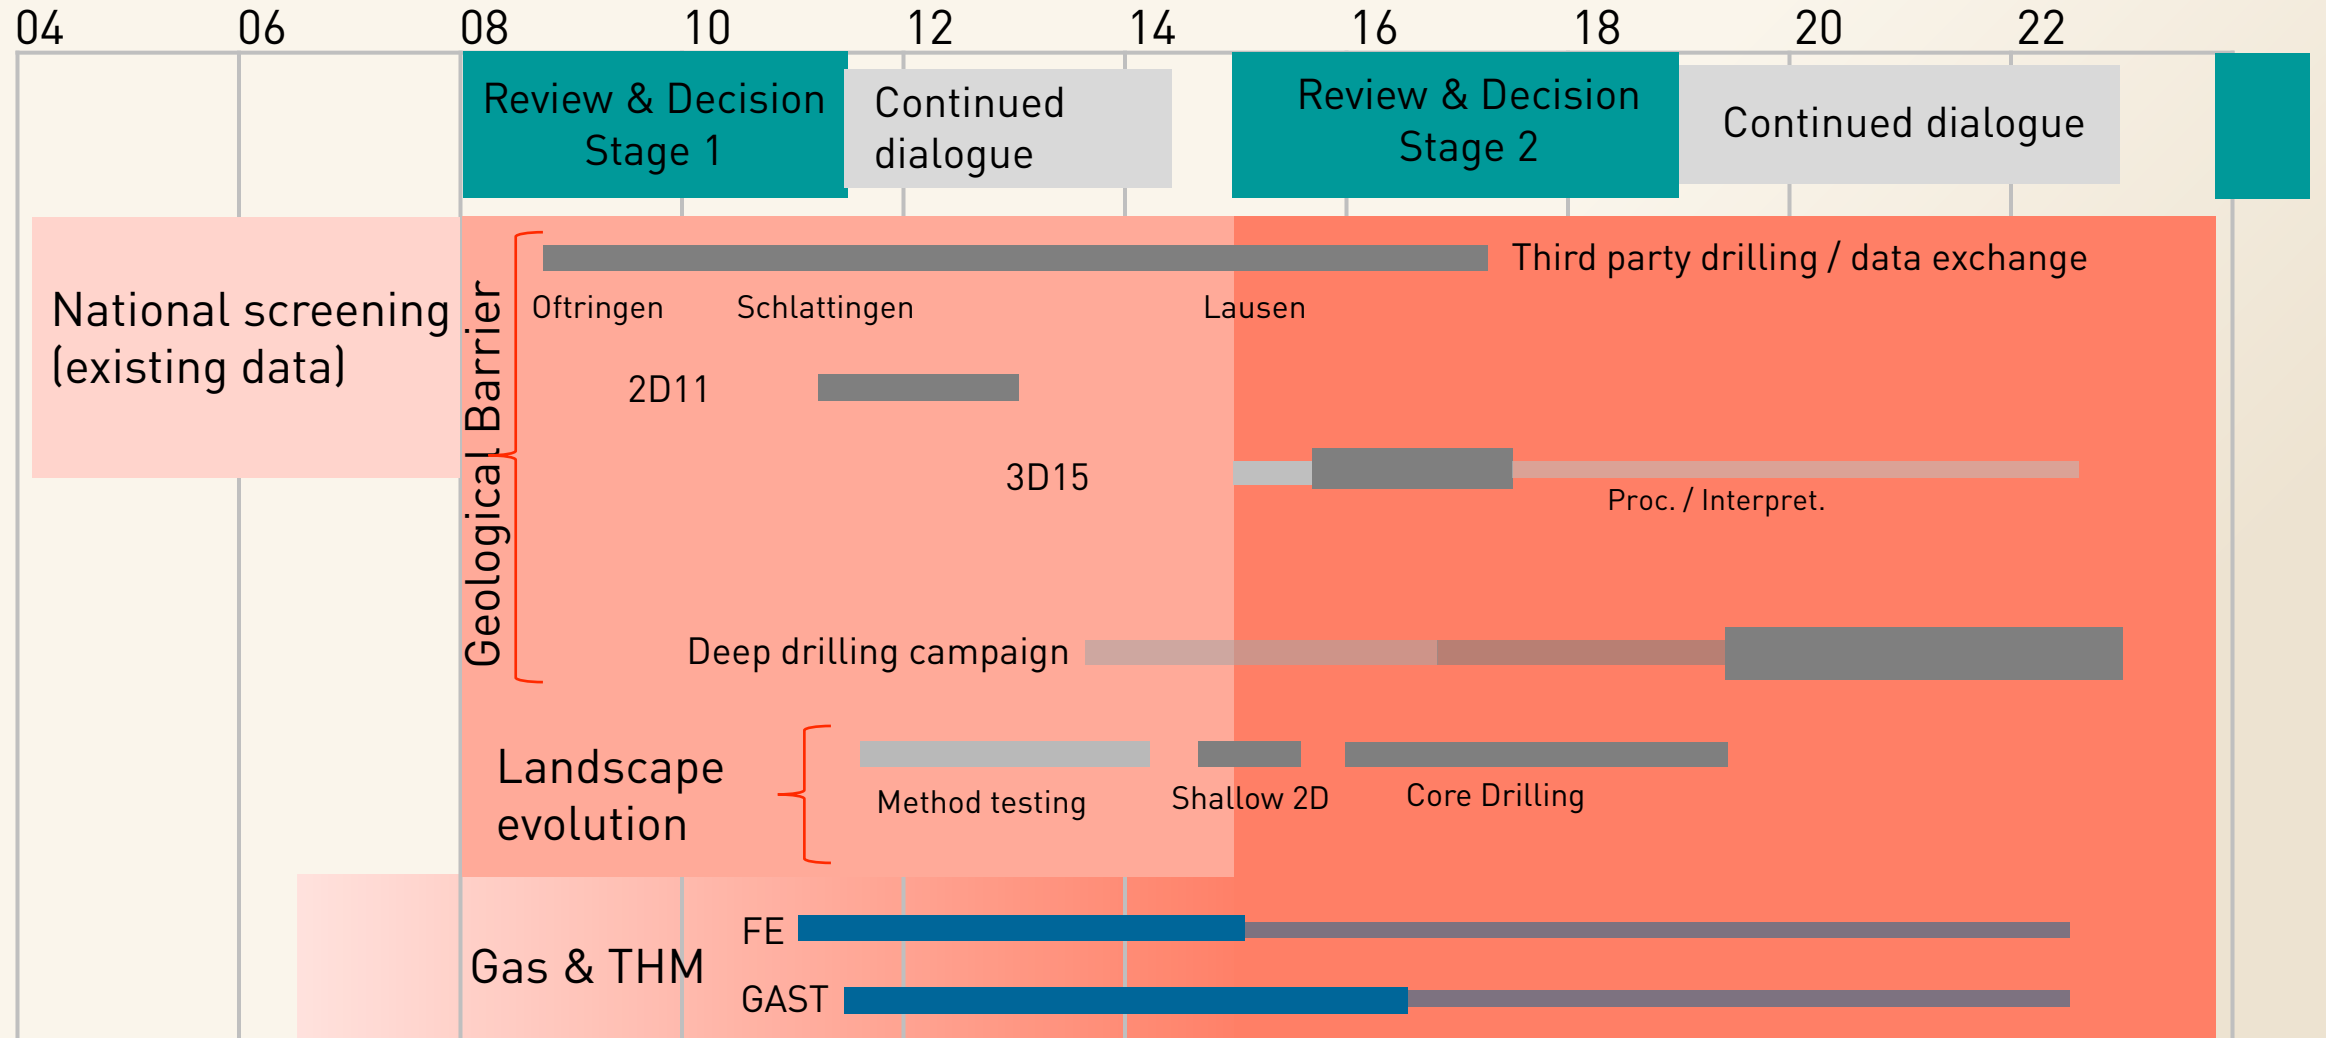



# WHAT WORKED IN SWITZERLAND

---

**Strategy: Early decisions** helped **focus resources** on promising regions

- Screen out significant parts of the country in early steps (tectonic regions)
- **Host rock defined for HLW in first step**
- **Only concept / pre-project level at GLA**

**Schedule: Speedy investigation** of sites (7 yrs saved)

- Development of methods
- Participation in 3rd party drillholes
- 2D seismics and 3D Seismics (critical path works)
- In parallel with decision making

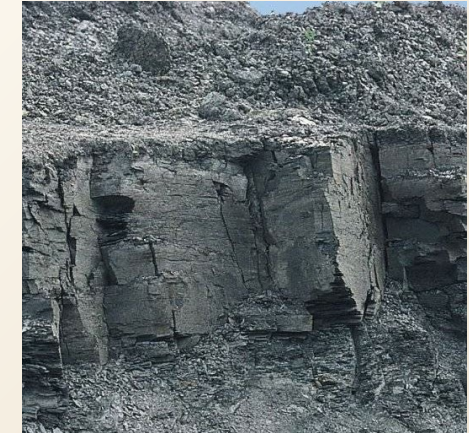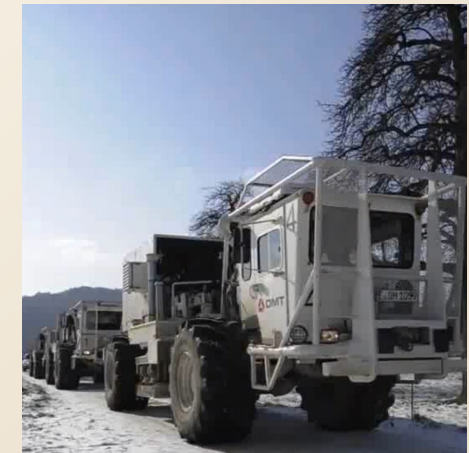



# UNLIMITED TIME?

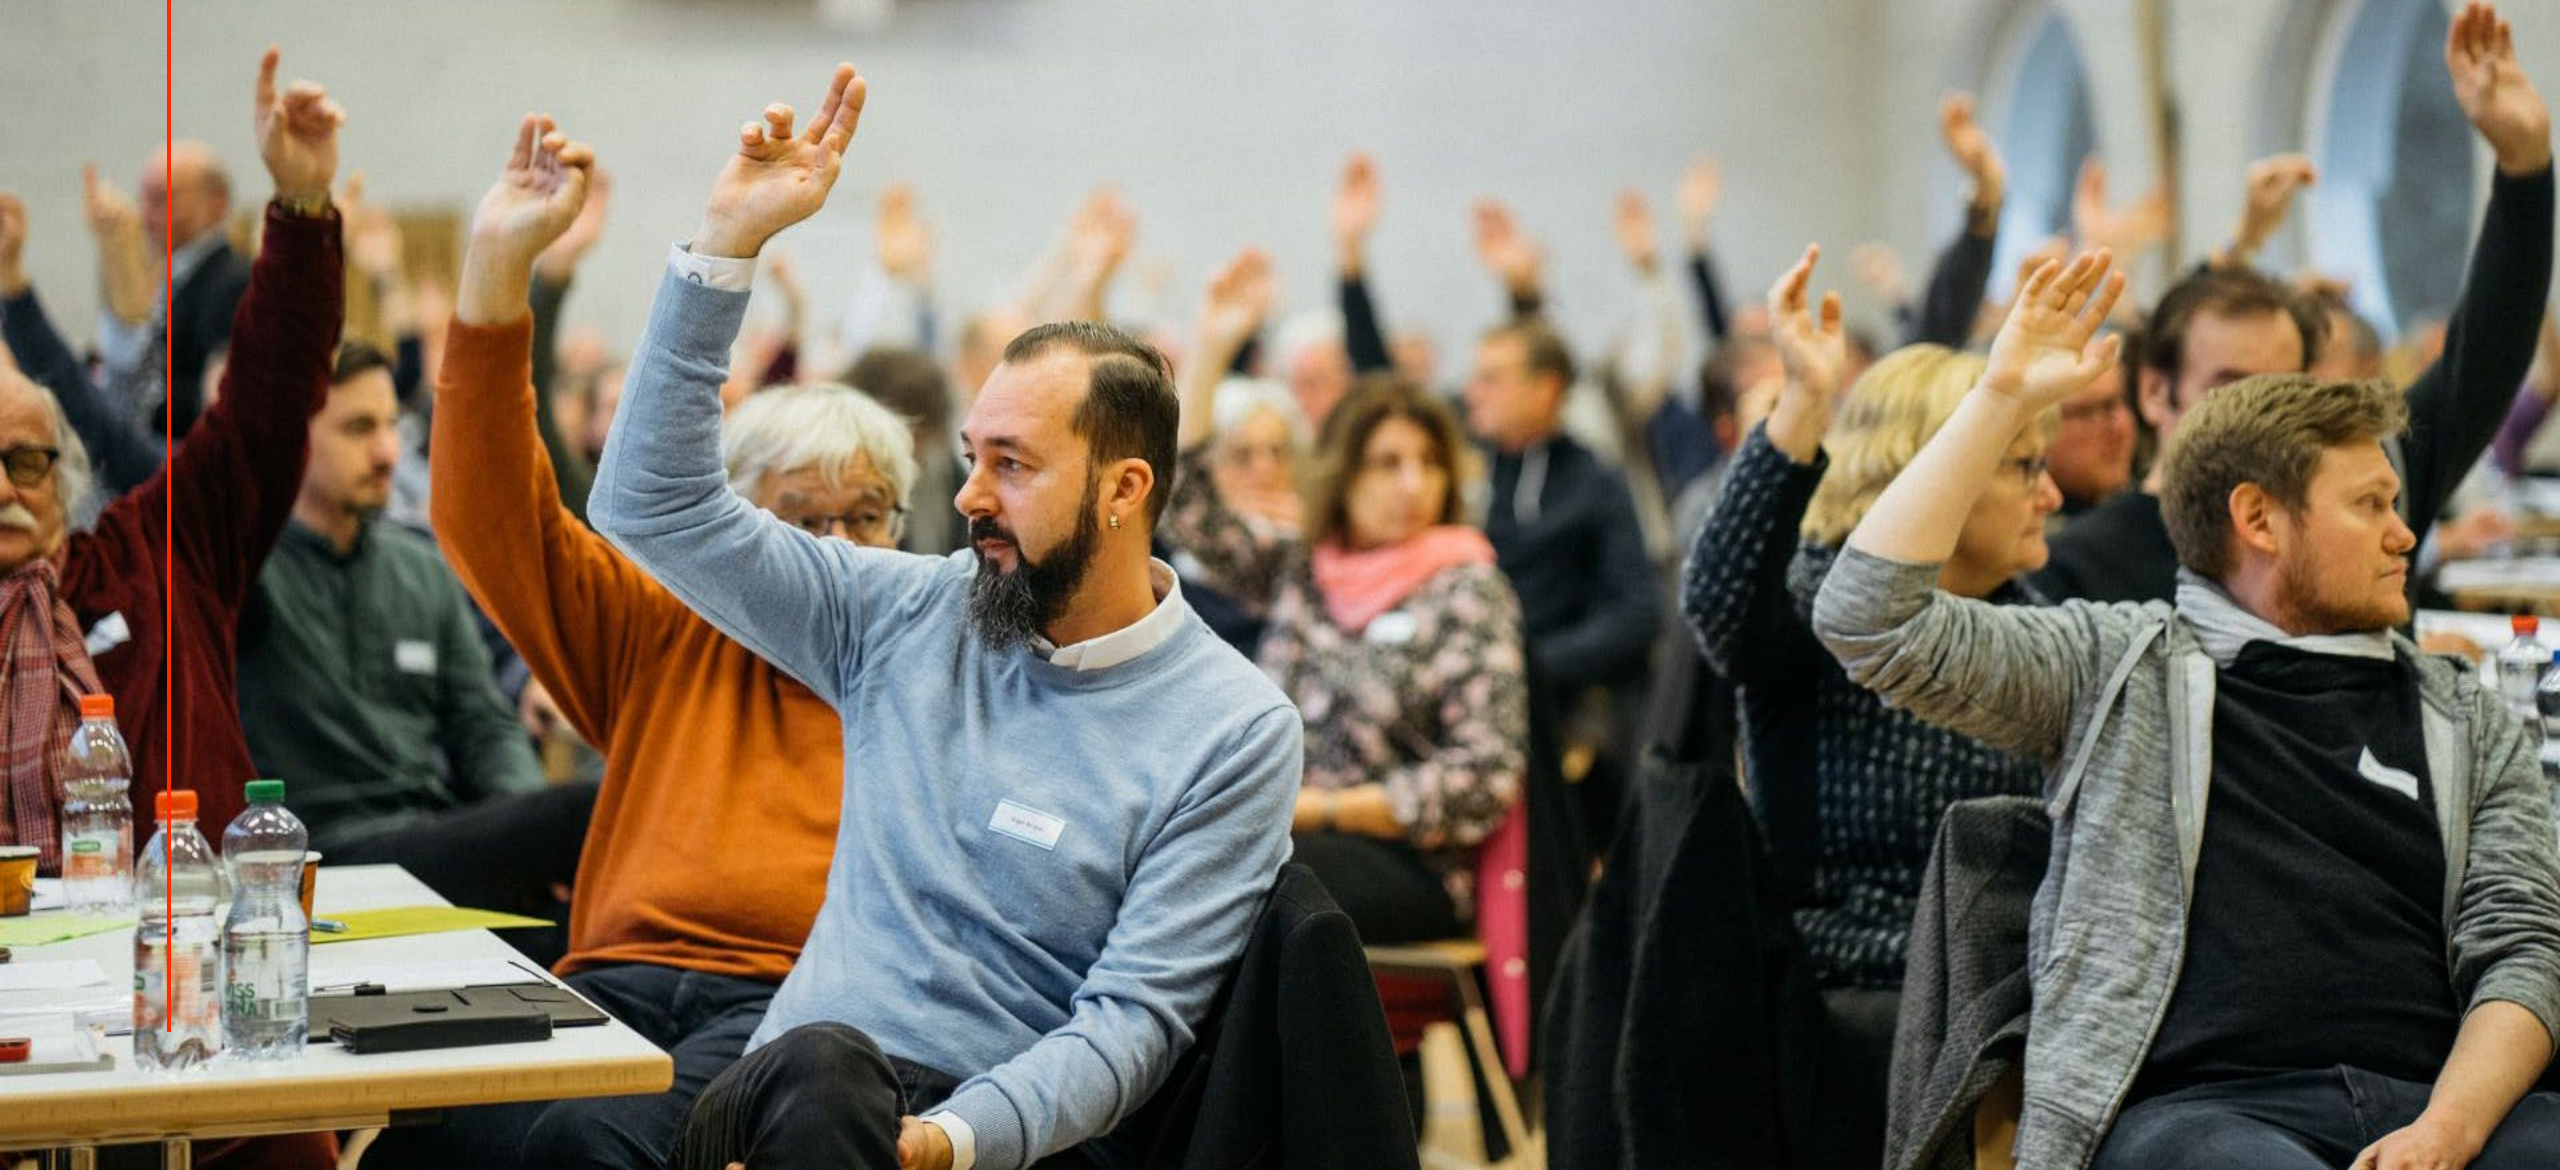

Supplement: Supplementary file 1 [file sand-2-37-2023-supplement.pdf]
